# Supplementary material
Source: publisher figshare collection journal article supplement (https://sage.figshare.com/ndownloader/files/14652155)
Supplement: Supplementary file 1 [file 14652155]

## Headache questionnaire secondary school

Questionnaire # GY- \_\_\_\_\_

Date : \_\_\_\_\_

1) Are you a girl or a boy?

☐ Girl

☐ Boy

2) Which class level do you attend? / How old are you?

Class level: \_\_\_\_\_ Age: \_\_\_\_\_

3) Do you suffer from headaches?

☐ never

☐ rarely (1 x / month)

☐ more frequently ( $\geq 2$  x / month)

4) Where do you live?

☐ with both parents

☐ with my father

☐ with my mother

☐ with someone else: \_\_\_\_\_

--- If you **never** get any headaches, please proceed to question 17 (page 3, grey part of the questionnaire) ---

5) When you have a headache ... (Please check as many answers as apply)

☐ you take a rest in a dark room

☐ you distract yourself

☐ you suffer from nausea/sickness

☐ you can't participate at sports class at school

☐ something else: \_\_\_\_\_

6) Since when do you suffer from headaches?

Years: \_\_\_\_\_ Months: \_\_\_\_\_

7) How many days per months do you experience headaches?

Days: \_\_\_\_\_

8) How bad do your headaches hurt? (Please check a number)

The numbers between 0 and 10 stand for different intensities of pain. 0 means no pain at all whereas 10 stands for the most intense pain one can imagine.

☐ 0

☐ 2

☐ 4

☐ 6

☐ 8

☐ 10

9) During the last 3 months, how many days of school have you missed because of your headache? \_\_\_\_\_

10) Which drugs do you take because of your headache? (Please check as many answers as apply)

☐ Paracetamol

☐ Triptans

☐ others (e.g. homeopathy)

☐ Ibuprofen

☐ Metamizole

\_\_\_\_\_

11) How bad do your headaches get before you take pain relievers? (Please check a number)

The numbers between 0 and 10 stand for different intensities of pain. 0 means no pain at all whereas 10 stands for the most intense pain one can imagine.

☐ 0

☐ 2

☐ 4

☐ 6

☐ 8

☐ 10

12) During the last 3 months, did you take drugs because of your headache?

☐ no

☐  $\geq 1$  x / month

☐  $\geq 5$  x / month

13) During the last 3 months, did you consult your doctor because of your headaches?

☐ no

☐ yes: once

☐ yes: several times

14) How much do your headaches affect your everyday life (concerning school, leisure time...)?

☐ not at all

☐ very little

☐ medium

☐ very much

☐ most imaginable

**15) Did your doctor give you a diagnosis concerning your headaches?**

- ☐ yes: migraine      ☐ yes: tension headaches      ☐ yes: other      ☐ no diagnosis given

**16) Can you describe your headaches a little more?** (Please check as many answers as apply)

- ☐ dull      ☐ pulsatile      ☐ weak to medium intensity  
☐ medium to strong intensity      ☐ unilateral      ☐ bilateral

**17) How often do you exercise (so that you're short of breath or start sweating)?**

- ☐ never      ☐ 1-2x / week      ☐ 3-4x / week      ☐ daily

**18) What is your height and weight?**

Weight: \_\_\_\_\_ kg      Height: \_\_\_\_\_ cm

**19) Do you smoke cigarettes?**

- ☐ no      ☐ 1-2x / week      ☐ daily

**20) Do you drink alcoholic drinks?**

- ☐ no      ☐ 1-2x / week      ☐ daily

**21) How often do you drink caffeinated drinks (e.g. Coke, Coffee or Energy-Drinks)?**

- ☐ never      ☐ 1-2x / week      ☐ daily

**22) How long do you use your phone or a computer/tablet?**

- ☐ not at all      ☐ 1-2 hours / day      ☐ more than 3 hours / day

**23) How long do you watch TV?**

- ☐ not at all      ☐ 1-2 hours / day      ☐ more than 3 hours / day

**24) Do you have family members that suffer from headaches?**

- ☐ no      ☐ yes: \_\_\_\_\_

**25) Do you experience pain in other regions of your body?** (Please check as many answers as apply)

- ☐ menstrual cramps      ☐ back pain, joint pain or muscular pain      ☐ stomachache  
☐ no      ☐ yes: others

**26) Do you take pain relievers for other bodily pain (except headaches)? If yes, what do you take?**

- ☐ no      ☐ yes: \_\_\_\_\_

**27) Do you take any other medication on a regular basis (except for pain relievers)? If yes, what do you take?**

- ☐ no      ☐ yes: \_\_\_\_\_

**Did you answer all 27 questions? Thank you very much for participating!**
